# Supplementary material
Source: Springer Nature journal article supplement (https://www.springermedizin.de/resource/supplementary/12967_2009_394_MOESM2_ESM.pdf/9576376)

**A.**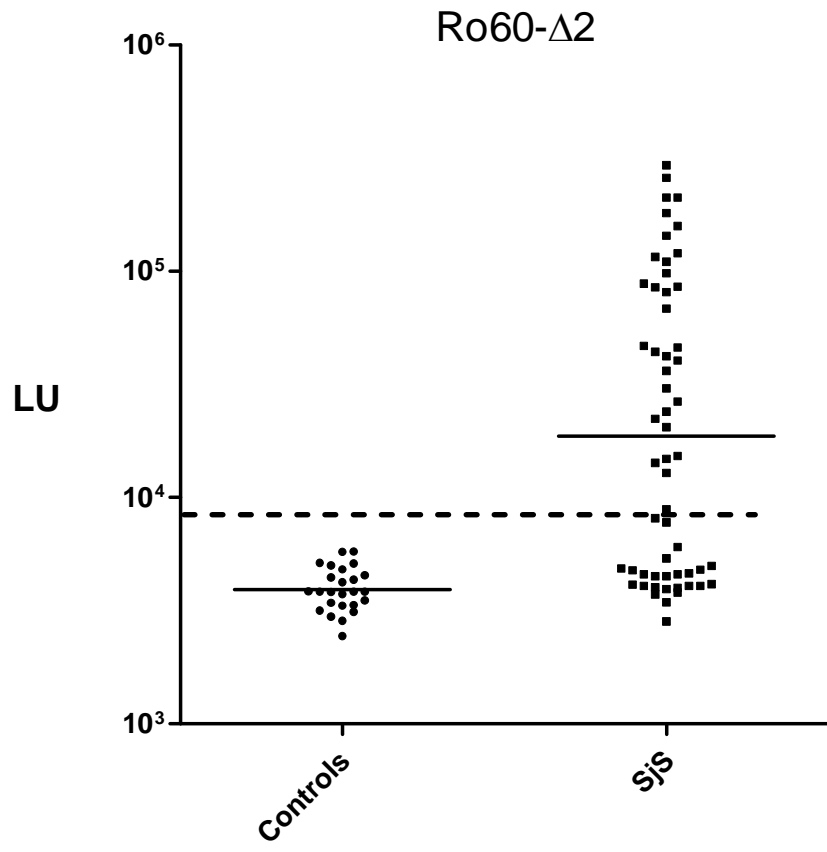**B.**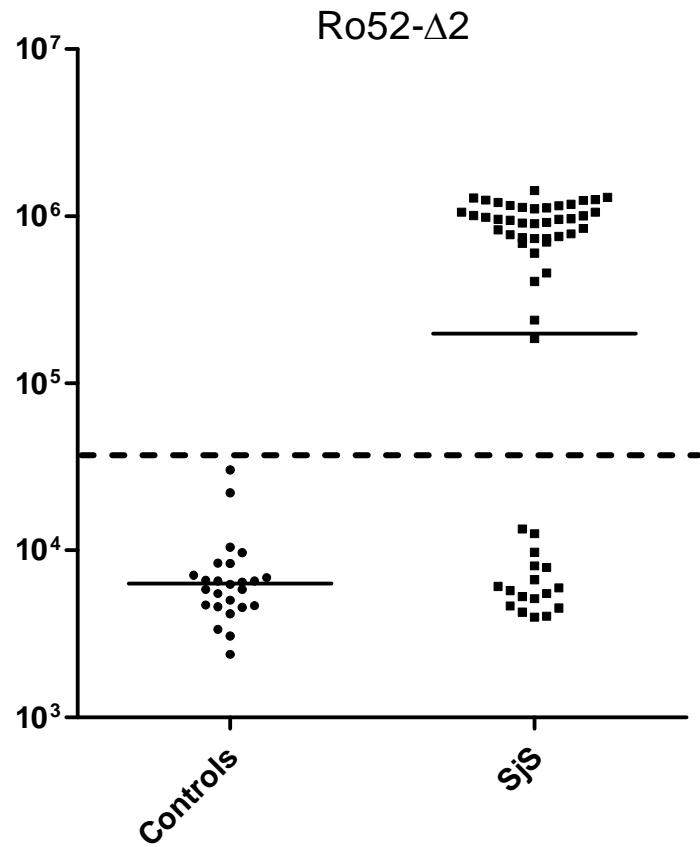

Supplement: MOESM2 [file 9576376]
